# Supplementary material for: Microbiome and Metagenome Analyses of a Closed Habitat during Human Occupation
Source: PubMed Central journal article supplement (PMC7394354; doi:10.1128/msystems.00367-20), 2020-07-28

| Bacterial Culture Classification   | Analog habitat sampling locations |    |    |    |    |     |     |     | Abundance |
|------------------------------------|-----------------------------------|----|----|----|----|-----|-----|-----|-----------|
|                                    | E3                                | E4 | E5 | E6 | E7 | E12 | E13 | E16 |           |
| <i>Bacillus pumilus</i>            |                                   | 1  | 4  | 2  | 3  | 4   | 1   | 1   | 16        |
| <i>Bacillus velezensis</i>         |                                   |    |    |    |    |     | 1   |     | 1         |
| <i>Bacillus subtilis</i>           |                                   |    |    |    |    | 2   |     |     | 2         |
| <i>Bacillus cereus</i>             |                                   | 1  |    |    | 1  |     |     | 3   | 5         |
| <i>Virgibacillus chiguensis</i>    |                                   |    |    |    |    |     |     | 1   | 1         |
| <i>Brevibacterium caesai</i>       |                                   |    |    |    |    |     | 1   |     | 1         |
| <i>Paenibacillus lemnae</i>        |                                   |    |    |    |    | 1   |     |     | 1         |
| <i>Staphylococcus haemolyticus</i> | 3                                 |    |    |    |    |     |     |     | 3         |
| <i>Staphylococcus cohnii</i>       |                                   |    | 1  |    |    |     |     |     | 1         |
| <i>Staphylococcus arlettae</i>     |                                   |    |    |    | 2  |     |     |     | 2         |
| Total No. Isolates/Location        | 3                                 | 2  | 5  | 2  | 6  | 7   | 3   | 5   | 33        |

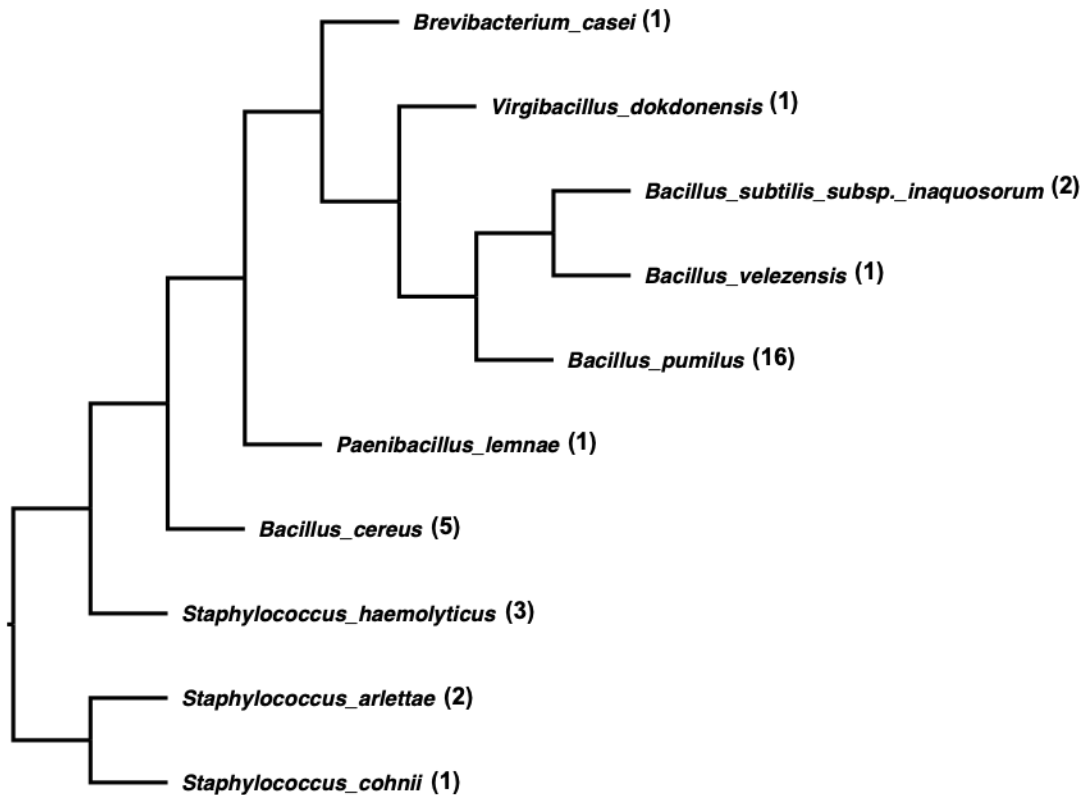

Supplement: mSystems.00367-20-sf001.pdf [file mSystems.00367-20-sf001.pdf]
