# Supplementary material for: Microbiome and Metagenome Analyses of a Closed Habitat during Human Occupation
Source: PubMed Central journal article supplement (PMC7394354; doi:10.1128/msystems.00367-20), 2020-07-28

# Supplemental Figure S2

| Fungal Culture Classification  | Analog habitat sampling locations |    |    |    |    |    |     |     |     |     |     | Abundance |
|--------------------------------|-----------------------------------|----|----|----|----|----|-----|-----|-----|-----|-----|-----------|
|                                | E3                                | E4 | E5 | E6 | E7 | E8 | E11 | E12 | E13 | E15 | E16 |           |
| <i>Aspergillus sydowii</i>     | 3                                 | 2  | 1  | 2  | 4  |    | 1   | 2   | 1   | 1   |     | 17        |
| <i>Aspergillus silvaticus</i>  |                                   |    |    |    | 1  |    |     | 2   |     |     | 1   | 4         |
| <i>Penicillium citrinum</i>    |                                   | 2  |    |    |    |    |     |     |     |     |     | 2         |
| <i>Aspergillus tubingensis</i> |                                   |    | 3  |    |    |    |     |     | 3   |     | 1   | 7         |
| <i>Ascomycota sp.</i>          |                                   | 1  | 3  |    |    | 1  | 1   |     | 2   |     |     | 8         |
| <i>Aspergillus flocculosus</i> |                                   |    |    |    | 2  |    |     |     |     |     | 4   | 6         |
| <i>Penicillium meleagrinum</i> |                                   |    |    |    |    |    |     | 1   |     |     |     | 1         |
| <i>Aspergillus ivoriensis</i>  |                                   |    |    |    |    | 1  |     |     |     |     |     | 1         |
| <i>Talaromyces radicus</i>     |                                   |    |    |    |    | 1  |     |     |     |     |     | 1         |
| Total No. Isolates/Location    | 3                                 | 5  | 6  | 2  | 7  | 3  | 2   | 5   | 6   | 1   | 6   | 47        |

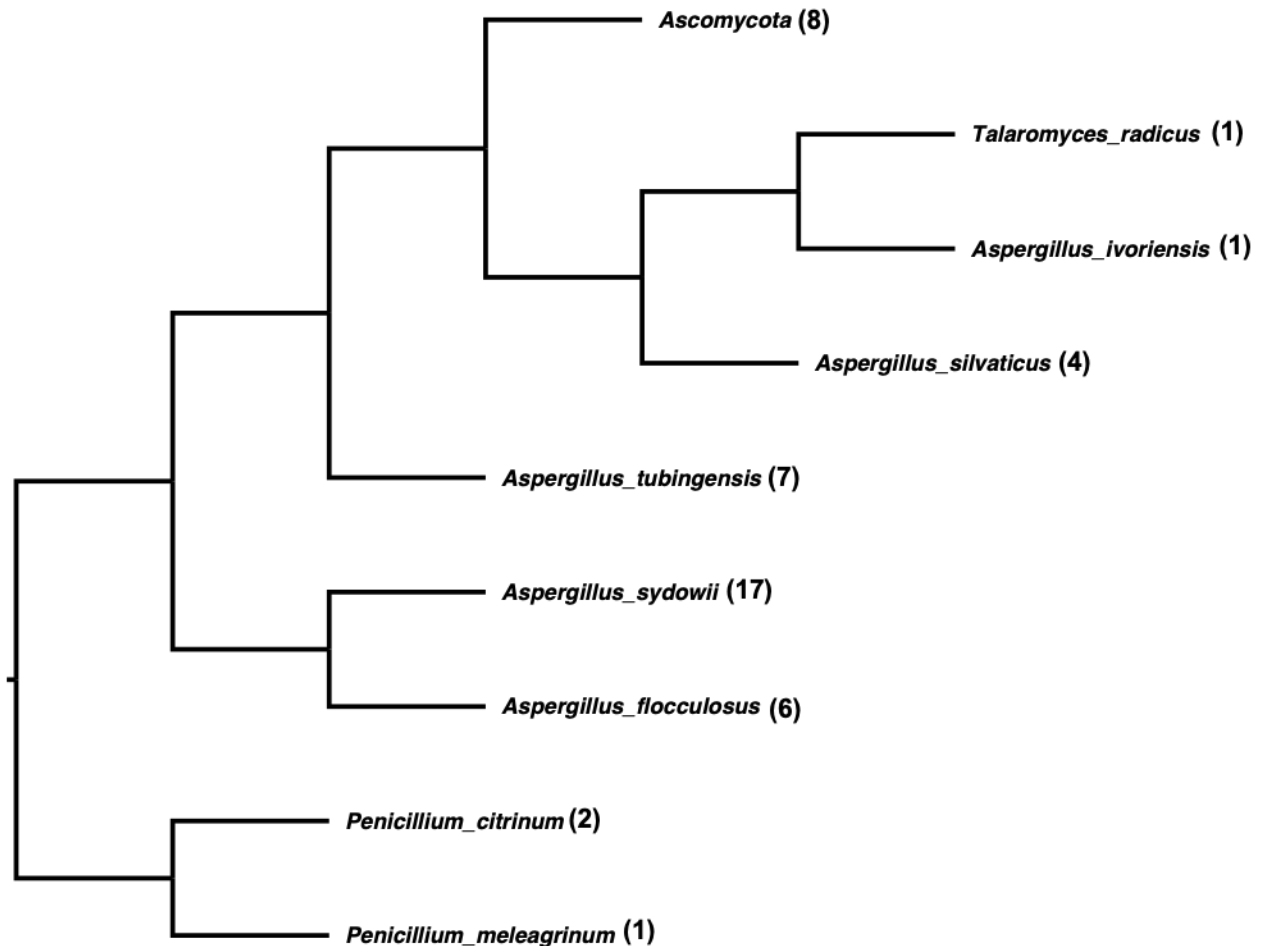

Supplement: mSystems.00367-20-sf002.pdf [file mSystems.00367-20-sf002.pdf]
