# Supplementary material for: Microbiome and Metagenome Analyses of a Closed Habitat during Human Occupation
Source: PubMed Central journal article supplement (PMC7394354; doi:10.1128/msystems.00367-20), 2020-07-28

A

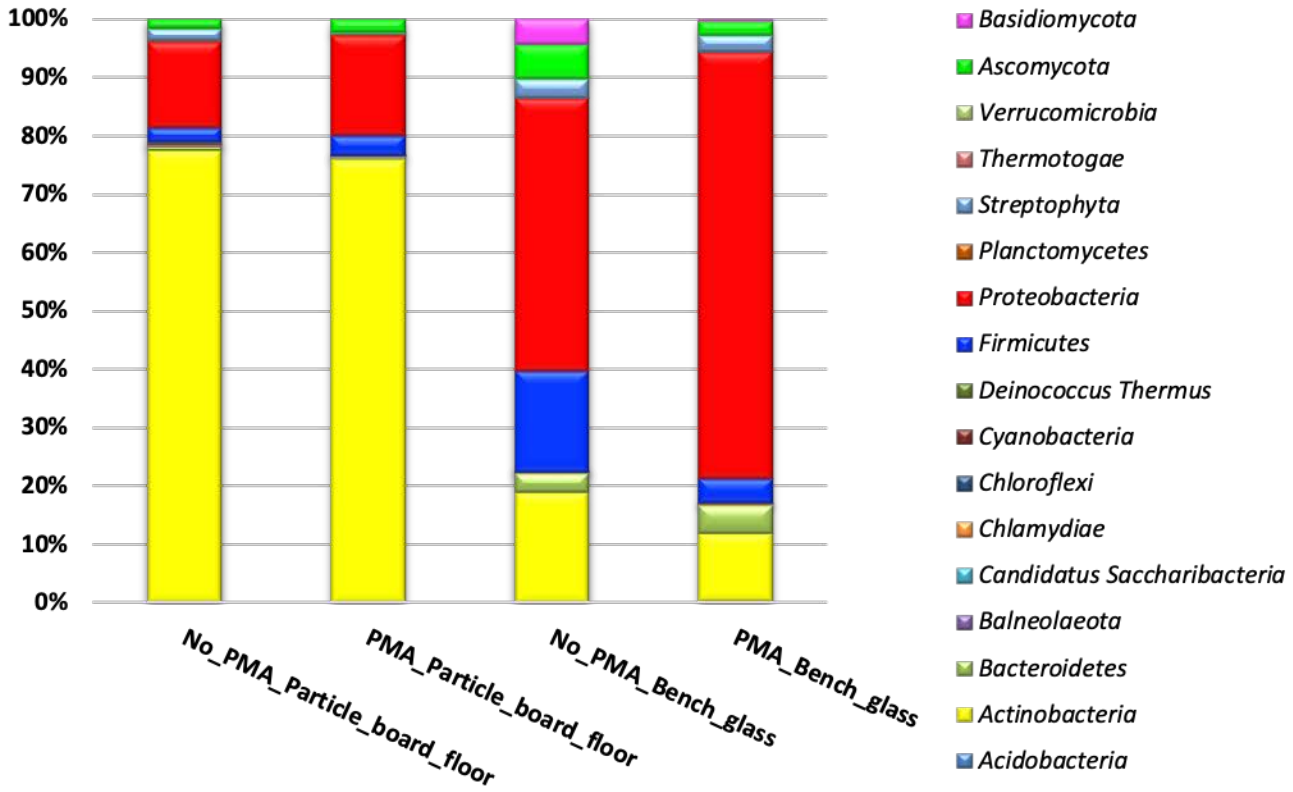

B

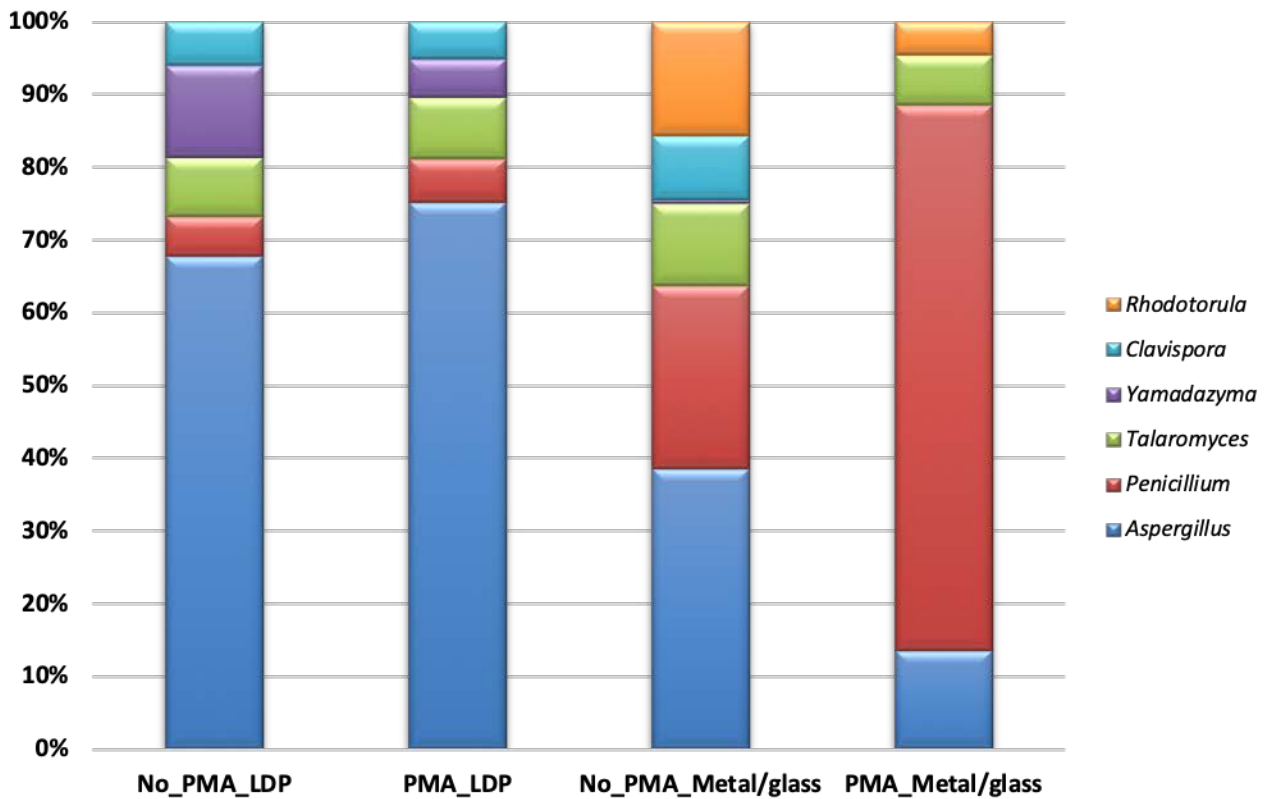

Supplement: mSystems.00367-20-sf003.pdf [file mSystems.00367-20-sf003.pdf]
